# Supplementary material
Source: MDPI journal article supplement (https://www.mdpi.com/2073-4441/15/21/3719)
Supplement: s1 [file s1]

Table S1: Aggregations of aggregated stakeholder responses using approximate numbers and confidence intervals.

| #  | Abbreviated question                      | Approximate Number | +1   | -1  | Lower +1 | Upper +1 | Lower -1 | Upper -1 | Conclusion    | Group 1       | Group 2       | Group 3       |
|----|-------------------------------------------|--------------------|------|-----|----------|----------|----------|----------|---------------|---------------|---------------|---------------|
| 4  | q1: concerned with selection of WWT       | 0.5±0.8            | 73%  | 19% | 52%      | 88%      | 7%       | 39%      | Strongly Yes  | Unanimous Yes | IN            | IN            |
| 5  | q2: no interest in WWT technologies       | -0.9±0.4           | 4%   | 92% | 0%       | 20%      | 75%      | 99%      | Strongly No   | IN            | Unanimous No  | Strongly No   |
| 6  | q2: interest in approval of WWT           | -0.5±0.8           | 15%  | 62% | 4%       | 35%      | 41%      | 80%      | No            | IN            | IN            | IN            |
| 7  | q2: interest in selection of WWT          | 0.2±0.9            | 50%  | 31% | 30%      | 70%      | 14%      | 52%      | CF/Yes        | IN            | IN            | IN            |
| 8  | q2: interest in research about WWT        | -0.2±0.9           | 31%  | 54% | 14%      | 52%      | 33%      | 73%      | CF/No         | IN            | IN            | Strongly Yes  |
| 9  | q2: other interest                        | -0.96±0.20         | 0%   | 96% | 0%       | 13%      | 80%      | 100%     | Strongly No   | Unanimous No  | Strongly No   | Strongly No   |
| 10 | q3: BAT known                             | 0.5±0.8            | 65%  | 19% | 44%      | 83%      | 7%       | 39%      | Yes           | Strongly Yes  | IN            | IN            |
| 11 | q4: BAT rather important                  | 0.88±0.33          | 88%  | 0%  | 70%      | 98%      | 0%       | 13%      | Strongly Yes  | Strongly Yes  | Strongly Yes  | Unanimous Yes |
| 12 | q5: flexible BAT is suitable              | 1.                 | 100% | 0%  | 87%      | 100%     | 0%       | 13%      | Unanimous Yes | Unanimous Yes | Unanimous Yes | Unanimous Yes |
| 13 | q6: existing WWT are BAT                  | 0.3±0.8            | 58%  | 23% | 37%      | 77%      | 9%       | 44%      | CF/Yes        | IN            | Strongly Yes  | IN            |
| 14 | q7a: environmental impacts matter for WWT | 1.                 | 100% | 0%  | 87%      | 100%     | 0%       | 13%      | Unanimous Yes | Unanimous Yes | Unanimous Yes | Unanimous Yes |
| 15 | q7a: costs matter for WWT                 | 0.8±0.5            | 85%  | 4%  | 65%      | 96%      | 0%       | 20%      | Strongly Yes  | Unanimous Yes | Strongly Yes  | IN            |
| 16 | q7a: acceptance by users matters for WWT  | 0.8±0.5            | 81%  | 4%  | 61%      | 93%      | 0%       | 20%      | Strongly Yes  | IN            | Unanimous Yes | Strongly Yes  |
| 17 | q7a: ease of use matters for WWT          | 0.88±0.33          | 88%  | 0%  | 70%      | 98%      | 0%       | 13%      | Strongly Yes  | Strongly Yes  | Strongly Yes  | Unanimous Yes |
| 18 | q7a: health matters for WWT               | 0.9±0.4            | 92%  | 4%  | 75%      | 99%      | 0%       | 20%      | Strongly Yes  | IN            | Unanimous Yes | Unanimous Yes |
| 19 | q7a: recycling matters for WWT            | 0.7±0.6            | 77%  | 8%  | 56%      | 91%      | 1%       | 25%      | Yes           | IN            | IN            | Unanimous Yes |

Table continued (next page):

Table S1, continued

| #  | Question                                        | Approximate Number | +1  | -1  | Lower +1 | Upper +1 | Lower -1 | Upper -1 | Conclusion    | Group 1       | Group 2      | Group 3       |
|----|-------------------------------------------------|--------------------|-----|-----|----------|----------|----------|----------|---------------|---------------|--------------|---------------|
| 20 | q7b: rank pollution                             | 0.8±0.4            | 77% | 0%  | 56%      | 91%      | 0%       | 13%      | Strongly Yes  | Strongly Yes  | Strongly Yes | IN            |
| 21 | q7b: rank costs                                 | 0.5±0.6            | 50% | 4%  | 30%      | 70%      | 0%       | 20%      | Yes           | IN            | IN           | IN            |
| 22 | q7b: rank acceptance                            | 0.4±0.6            | 46% | 4%  | 27%      | 67%      | 0%       | 20%      | Rather Yes    | IN            | IN           | IN            |
| 23 | q7b: rank ease of use                           | 0.5±0.6            | 54% | 8%  | 33%      | 73%      | 1%       | 25%      | Yes           | IN            | IN           | Strongly Yes  |
| 24 | q7b: rank health                                | 0.7±0.5            | 73% | 4%  | 52%      | 88%      | 0%       | 20%      | Yes           | Strongly Yes  | IN           | Strongly Yes  |
| 25 | q7b: rank recycling                             | 0.0±0.6            | 15% | 19% | 4%       | 35%      | 7%       | 39%      | Perhaps No    | IN            | IN           | IN            |
| 26 | q8a: recycling for irrigation is important      | 0.6±0.6            | 69% | 8%  | 48%      | 86%      | 1%       | 25%      | Yes           | Strongly Yes  | IN           | IN            |
| 27 | q8a: recycling for toilet flushing is important | 0.7±0.5            | 69% | 0%  | 48%      | 86%      | 0%       | 13%      | Strongly Yes  | Strongly Yes  | IN           | Strongly Yes  |
| 28 | q8a: recycling of sludge is important           | 0.5±0.7            | 58% | 12% | 37%      | 77%      | 2%       | 30%      | Yes           | Unanimous Yes | IN           | IN            |
| 29 | q8a: use of biogas is important                 | 0.5±0.6            | 62% | 8%  | 41%      | 80%      | 1%       | 25%      | Yes           | IN            | IN           | IN            |
| 30 | q8a: other is important                         | 0.0±0.4            | 12% | 8%  | 2%       | 30%      | 1%       | 25%      | Perhaps Yes   | IN            | IN           | IN            |
| 31 | q8b: rank irrigation                            | 0.6±0.5            | 62% | 0%  | 41%      | 80%      | 0%       | 13%      | Yes           | Strongly Yes  | IN           | IN            |
| 32 | q8b: rank toilet                                | 0.6±0.6            | 65% | 4%  | 44%      | 83%      | 0%       | 20%      | Yes           | IN            | IN           | Strongly Yes  |
| 33 | q8b: rank sludge                                | 0.4±0.5            | 42% | 0%  | 23%      | 63%      | 0%       | 13%      | Rather Yes    | Strongly Yes  | IN           | IN            |
| 34 | q8b: rank biogas                                | 0.4±0.7            | 50% | 12% | 30%      | 70%      | 2%       | 30%      | CF/Yes        | Strongly Yes  | IN           | IN            |
| 35 | q8b: rank other                                 | 0.0±0.4            | 8%  | 8%  | 1%       | 25%      | 1%       | 25%      | Indeterminate | IN            | IN           | IN            |
| 36 | q9: interest in standards                       | 0.5±0.8            | 69% | 15% | 48%      | 86%      | 4%       | 35%      | Yes           | IN            | IN           | Unanimous Yes |

Table continued (next page):

Table S1, continued

| #  | Question                                       | Approximate Number | +1  | -1  | Lower +1 | Upper +1 | Lower -1 | Upper -1 | Conclusion  | Group 1      | Group 2      | Group 3      |
|----|------------------------------------------------|--------------------|-----|-----|----------|----------|----------|----------|-------------|--------------|--------------|--------------|
| 37 | q10: add pollutant to standards                | 0.0±0.8            | 31% | 27% | 14%      | 52%      | 12%      | 48%      | Perhaps Yes | IN           | IN           | IN           |
| 38 | q10: keep standards as they are                | -0.3±0.7           | 12% | 46% | 2%       | 30%      | 27%      | 67%      | Perhaps No  | IN           | IN           | IN           |
| 39 | q10: remove pollutants from standards          | -0.2±0.7           | 15% | 38% | 4%       | 35%      | 20%      | 59%      | Perhaps No  | IN           | IN           | IN           |
| 40 | q11: relax thresholds of standards             | 0.0±0.7            | 19% | 27% | 7%       | 39%      | 12%      | 48%      | Perhaps No  | IN           | IN           | IN           |
| 41 | q11: keep thresholds                           | -0.1±0.7           | 19% | 31% | 7%       | 39%      | 14%      | 52%      | Perhaps No  | IN           | IN           | Strongly Yes |
| 42 | q11: sharpen thresholds                        | -0.3±0.7           | 12% | 38% | 2%       | 30%      | 20%      | 59%      | Perhaps No  | IN           | IN           | Strongly No  |
| 43 | q12: enforcement of standards is rather strict | -0.3±0.7           | 15% | 50% | 4%       | 35%      | 30%      | 70%      | CF/No       | IN           | IN           | IN           |
| 44 | q13: users should pay most capital costs       | -0.2±0.8           | 23% | 42% | 9%       | 44%      | 23%      | 63%      | Perhaps No  | IN           | IN           | IN           |
| 45 | q14: users should pay most O&M costs           | 0.2±0.8            | 42% | 27% | 23%      | 63%      | 12%      | 48%      | Perhaps Yes | IN           | IN           | IN           |
| 46 | q15: substantial revenues from recycling       | 0.1±0.8            | 38% | 27% | 20%      | 59%      | 12%      | 48%      | Perhaps Yes | IN           | IN           | IN           |
| 47 | q16a: Union government should drive recycling  | 0.5±0.6            | 58% | 8%  | 37%      | 77%      | 1%       | 25%      | Yes         | IN           | IN           | IN           |
| 48 | q16a: state government should drive recycling  | 0.6±0.6            | 62% | 4%  | 41%      | 80%      | 0%       | 20%      | Yes         | IN           | Strongly Yes | IN           |
| 49 | q16a: ULBs should drive recycling              | 0.4±0.7            | 54% | 12% | 33%      | 73%      | 2%       | 30%      | Yes         | IN           | IN           | IN           |
| 50 | q16a: private sector should drive recycling    | -0.2±0.8           | 19% | 42% | 7%       | 39%      | 23%      | 63%      | Perhaps No  | IN           | IN           | IN           |
| 51 | q16a: other drivers                            | 0.0±0.4            | 4%  | 12% | 0%       | 20%      | 2%       | 30%      | Perhaps No  | IN           | IN           | IN           |
| 52 | q16b: rank Union government as driver          | 0.5±0.6            | 58% | 4%  | 37%      | 77%      | 0%       | 20%      | Yes         | IN           | IN           | Strongly Yes |
| 53 | q16b: rank state government as driver          | 0.7±0.5            | 77% | 4%  | 56%      | 91%      | 0%       | 20%      | Yes         | Strongly Yes | Strongly Yes | IN           |

Table continued (next page):

Table S1, continued

| #  | Question                                                | Approximate Number | +1  | -1  | Lower +1 | Upper +1 | Lower -1 | Upper -1 | Conclusion   | Group 1 | Group 2       | Group 3      |
|----|---------------------------------------------------------|--------------------|-----|-----|----------|----------|----------|----------|--------------|---------|---------------|--------------|
| 54 | q16b: rank ULBs as driver                               | 0.5±0.5            | 50% | 0%  | 30%      | 70%      | 0%       | 13%      | Yes          | IN      | IN            | IN           |
| 55 | q16b: rank private sector as driver                     | 0.2±0.8            | 38% | 23% | 20%      | 59%      | 9%       | 44%      | Perhaps Yes  | IN      | IN            | IN           |
| 56 | q16b: rank “other drivers”                              | 0.2±0.8            | 38% | 23% | 20%      | 59%      | 9%       | 44%      | Perhaps Yes  | IN      | IN            | IN           |
| 57 | q18: violation of standard is barrier                   | 0.5±0.6            | 58% | 4%  | 37%      | 77%      | 0%       | 20%      | Yes          | IN      | IN            | IN           |
| 58 | q18: futile over-fulfillment of standards is barrier    | 0.2±0.8            | 42% | 19% | 23%      | 63%      | 7%       | 39%      | Perhaps Yes  | IN      | IN            | IN           |
| 59 | q18:nitrogen irrelevant if water is used for irrigation | 0.3±0.6            | 38% | 8%  | 20%      | 59%      | 1%       | 25%      | Perhaps Yes  | IN      | IN            | IN           |
| 60 | q18: capital costs are barrier                          | 0.5±0.6            | 58% | 8%  | 37%      | 77%      | 1%       | 25%      | Yes          | IN      | Strongly Yes  | IN           |
| 61 | q18: O&M costs are barrier                              | 0.3±0.7            | 50% | 15% | 30%      | 70%      | 4%       | 35%      | CF/Yes       | IN      | IN            | IN           |
| 62 | q18: lack of capacity hinders implementation            | 0.3±0.7            | 42% | 12% | 23%      | 63%      | 2%       | 30%      | Perhaps Yes  | IN      | IN            | IN           |
| 63 | q18: lack of qualified personnel is barrier             | 0.3±0.7            | 50% | 15% | 30%      | 70%      | 4%       | 35%      | CF/Yes       | IN      | IN            | IN           |
| 64 | q18: lacking demand for unknown technology              | 0.3±0.7            | 46% | 12% | 27%      | 67%      | 2%       | 30%      | Perhaps Yes  | IN      | IN            | IN           |
| 65 | q18: procurement impedes implementation                 | 0.1±0.7            | 31% | 19% | 14%      | 52%      | 7%       | 39%      | Perhaps Yes  | IN      | IN            | IN           |
| 66 | q18: lack of approval or certification is barrier       | 0.3±0.8            | 50% | 19% | 30%      | 70%      | 7%       | 39%      | CF/Yes       | IN      | IN            | IN           |
| 67 | q18: water reuse not accepted by the public             | 0.4±0.7            | 50% | 12% | 30%      | 70%      | 2%       | 30%      | CF/Yes       | IN      | IN            | IN           |
| 68 | q18: there is no incentive for water reuse              | 0.3±0.7            | 38% | 12% | 20%      | 59%      | 2%       | 30%      | Perhaps Yes  | IN      | IN            | IN           |
| 69 | q18: other barriers                                     | 0.2±0.5            | 19% | 4%  | 7%       | 39%      | 0%       | 20%      | Perhaps Yes  | IN      | IN            | IN           |
| 70 | q19: make recycling mandatory                           | 0.8±0.5            | 88% | 4%  | 70%      | 98%      | 0%       | 20%      | Strongly Yes | IN      | Unanimous Yes | Strongly Yes |

Table continued (next page):

Table S1, continued

| #  | Question                                                     | Approximate Number | +1  | -1  | Lower +1 | Upper +1 | Lower -1 | Upper -1 | Conclusion   | Group 1       | Group 2       | Group 3      |
|----|--------------------------------------------------------------|--------------------|-----|-----|----------|----------|----------|----------|--------------|---------------|---------------|--------------|
| 71 | q19: penalize ULBs for not recycling                         | 0.88±0.33          | 88% | 0%  | 70%      | 98%      | 0%       | 13%      | Strongly Yes | Unanimous Yes | Strongly Yes  | Strongly Yes |
| 72 | q19: Union government should support recycling               | 0.8±0.4            | 85% | 0%  | 65%      | 96%      | 0%       | 13%      | Strongly Yes | Unanimous Yes | Strongly Yes  | IN           |
| 73 | q19 state government should support recycling                | 0.8±0.4            | 85% | 0%  | 65%      | 96%      | 0%       | 13%      | Strongly Yes | Strongly Yes  | Strongly Yes  | Strongly Yes |
| 74 | q19: international donors should provide loans for recycling | 0.6±0.6            | 69% | 8%  | 48%      | 86%      | 1%       | 25%      | Yes          | Strongly Yes  | IN            | IN           |
| 75 | q19: international technical assistance for recycling        | 0.8±0.5            | 88% | 4%  | 70%      | 98%      | 0%       | 20%      | Strongly Yes | Unanimous Yes | IN            | Strongly Yes |
| 76 | q19: user fees and taxes for recycling                       | 0.3±0.7            | 46% | 15% | 27%      | 67%      | 4%       | 35%      | Perhaps Yes  | IN            | IN            | IN           |
| 77 | q19: more awareness rising for recycling                     | 0.88±0.33          | 88% | 0%  | 70%      | 98%      | 0%       | 13%      | Strongly Yes | Unanimous Yes | Strongly Yes  | Strongly Yes |
| 78 | q19: more capacity building for recycling                    | 0.92±0.27          | 92% | 0%  | 75%      | 99%      | 0%       | 13%      | Strongly Yes | Unanimous Yes | Unanimous Yes | Strongly Yes |
| 79 | q20: rank mandatory                                          | 0.8±0.4            | 77% | 0%  | 56%      | 91%      | 0%       | 13%      | Strongly Yes | Strongly Yes  | Strongly Yes  | IN           |
| 80 | q20: rank penalty                                            | 0.5±0.6            | 54% | 8%  | 33%      | 73%      | 1%       | 25%      | Yes          | Strongly Yes  | IN            | Strongly Yes |
| 81 | q20: rank Union subsidies                                    | 0.7±0.6            | 69% | 4%  | 48%      | 86%      | 0%       | 20%      | Yes          | Strongly Yes  | IN            | Strongly Yes |
| 82 | q20: rank state subsidies                                    | 0.5±0.5            | 54% | 0%  | 33%      | 73%      | 0%       | 13%      | Yes          | IN            | IN            | IN           |
| 83 | q20: rank donors                                             | 0.4±0.6            | 42% | 4%  | 23%      | 63%      | 0%       | 20%      | Rather Yes   | Strongly Yes  | IN            | IN           |
| 84 | q20: rank assistance                                         | 0.3±0.6            | 38% | 4%  | 20%      | 59%      | 0%       | 20%      | Rather Yes   | Strongly Yes  | IN            | IN           |
| 85 | q20: rank fees & taxes                                       | 0.0±0.7            | 27% | 23% | 12%      | 48%      | 9%       | 44%      | Perhaps Yes  | IN            | IN            | IN           |
| 86 | q20: rank awareness rising                                   | 0.4±0.7            | 54% | 12% | 33%      | 73%      | 2%       | 30%      | Yes          | Strongly Yes  | IN            | IN           |
| 87 | q20: rank capacity building                                  | 0.3±0.7            | 46% | 15% | 27%      | 67%      | 4%       | 35%      | Perhaps Yes  | IN            | IN            | IN           |

**Note:** The numbering of the questions, #, starts with 4, as questions #1-3 relate to the respondents. “Question” abbreviates the question from the questionnaires; qX is question with number X in the questionnaire). “Approximate number” is an aggregation of the aggregated stakeholder responses to an imprecise number. +1, -1 are the percent of approval and disapproval, respectively. “Lower” and “Upper” are the lower and upper Clopper-Pearson confidence limits (assuming a two-sided P-value  $p = 0.5$ , corresponding to 95% confidence). Conclusion summarizes the outcomes on a scale “unanimous yes/no”, “strongly yes/no”, “yes/no”, “rather yes/no”, “perhaps yes/no” with decreasing reliability, as explained in the paper. Groups 1-3 are the aggregated responses within three groups of stakeholders, using the first two scales, only (and defining strongly yes/no using the definition of approval in terms of the function *Around*.)
